# Supplementary material
Source: Springer Nature journal article supplement (https://www.springermedizin.de/resource/supplementary/12887_2011_548_MOESM10_ESM.pdf/9475412)

**Food category**

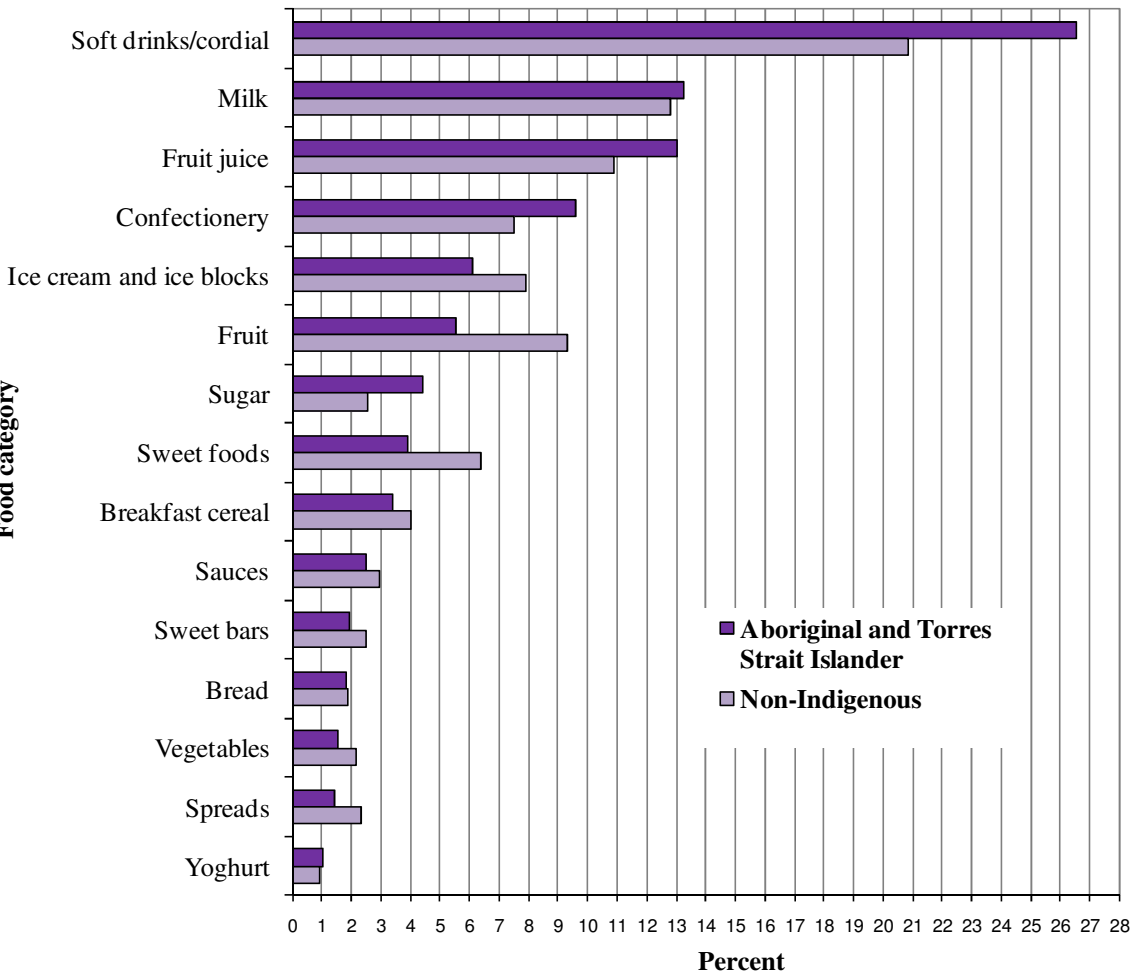

**■ Aboriginal and Torres Strait Islander**  
**■ Non-Indigenous**

Supplement: MOESM10 [file 9475412]
